# Supplementary material
Source: publisher site journal article supplement (http://kjim.org/upload/media/kjim-2021-021-suppl3.pdf)
Supplement: Supplementary file 1 [file kjim-2021-021-suppl3.pdf]

**Supplementary Table 3. Baseline characteristics at admission according to the initial ammonia level**

| Characteristic                 | Grade 0             | Grade 1             | Grade 2             | Grade 3             | p value <sup>a</sup> |
|--------------------------------|---------------------|---------------------|---------------------|---------------------|----------------------|
| Number                         | 585 (60.2)          | 291 (29.9)          | 55 (5.7)            | 41 (4.2)            |                      |
| Age, yr                        | 69.0 (57.0–78.0)    | 66.0 (55.0–76.0)    | 68.0 (54.0–76.0)    | 66.0 (53.0–75.0)    | 0.025                |
| Male sex                       | 280 (47.9)          | 169 (58.1)          | 32 (58.2)           | 231 (73.2)          | 0.001                |
| BMI, kg/m <sup>2</sup>         | 23.1 (20.7–25.5)    | 23.1 (20.2–25.6)    | 23.6 (20.3–26.3)    | 22.0 (19.6–25.2)    | 0.597                |
| Diabetes                       | 168 (28.7)          | 80 (27.5)           | 22 (40.0)           | 16 (39.0)           | 0.142                |
| Alcohol > 40 g/day             | 24 (4.1)            | 16 (5.5)            | 3 (5.5)             | 1 (2.4)             | 0.705                |
| CHF                            | 24 (4.1)            | 16 (5.5)            | 2 (3.6)             | 0                   | 0.398                |
| ESRD                           | 19 (3.2)            | 9 (3.1)             | 4 (7.3)             | 1 (2.4)             | 0.431                |
| Extrahepatic malignancy        | 28 (4.8)            | 19 (6.5)            | 4 (7.3)             | 1 (2.4)             | 0.521                |
| Endotracheal intubation        | 253 (43.2)          | 182 (62.5)          | 38 (69.1)           | 31 (75.6)           | < 0.001              |
| Acute brain failure            | 343 (58.6)          | 217 (74.6)          | 47 (85.5)           | 38 (92.7)           | < 0.001              |
| Serum ammonia, µg/dL           | 58.0 (46.0–68.0)    | 101.0 (89.0–120.0)  | 194.0 (169.0–216.0) | 333.0 (284.0–517.0) | < 0.001              |
| WBC, 10 × 10 <sup>9</sup> /L   | 11.3 (7.8–15.3)     | 12.7 (7.7–17.6)     | 13.3 (10.6–18.1)    | 14.9 (9.3–21.1)     | 0.001                |
| Hemoglobin, g/dL               | 12.5 (10.7–13.8)    | 12.3 (10.6–14.1)    | 11.3 (10.6–18.1)    | 12.8 (10.5–14.9)    | 0.213                |
| Platelet, × 10 <sup>9</sup> /L | 222.0 (172.0–269.0) | 226.0 (162.0–293.0) | 211.0 (139.0–283.0) | 231.0 (162.5–270.5) | 0.515                |
| BUN, mg/dL                     | 17.9 (13.9–28.7)    | 20.2 (13.8–32.7)    | 27.6 (17.5–55.6)    | 27.4 (15.5–42.3)    | < 0.001              |
| Creatinine, mg/dL              | 0.86 (0.65–1.33)    | 0.61 (0.93–1.51)    | 1.47 (0.77–2.43)    | 1.57 (1.18–2.96)    | < 0.001              |
| Bilirubin, mg/dL               | 0.68 (0.51–0.91)    | 0.67 (0.51–0.99)    | 0.68 (0.43–0.88)    | 0.68 (0.43–1.13)    | 0.804                |
| Albumin, g/dL                  | 3.8 (3.1–4.2)       | 3.4 (2.8–4.0)       | 2.9 (2.5–3.6)       | 3.3 (2.9–3.9)       | < 0.001              |
| Total cholesterol, mg/dL       | 159.0 (123.0–196.5) | 146.0 (115.0–179.0) | 127.0 (95.0–169.0)  | 152.0 (104.5–184.0) | 0.001                |
| PT-INR                         | 1.04 (0.98–1.16)    | 1.1 (1.01–1.30)     | 1.32 (1.13–1.59)    | 1.32 (1.17–1.53)    | < 0.001              |

Values are presented as number (%) or median (interquartile range).

BMI, body mass index; CHF, congestive heart failure; ESRD, end-stage renal disease; WBC, white blood cell; BUN, blood urea nitrogen; PT-INR, prothrombin time-international normalized ratio.

<sup>a</sup>Kruskal-wallis test and Pearson chi-square test.
